# Supplementary material for: A computational analysis of the three isoforms of glutamate dehydrogenase reveals structural features of the isoform EC 1.4.1.4 supporting a key role in ammonium assimilation by plants
Source: PubMed Central journal article supplement (PMC1716157; doi:10.1186/1745-6150-1-38), 2006-12-15
Supplement: 1745-6150-1-38-S1.pdf [file 1745-6150-1-38-S1.pdf]

## Appendix 1

| <b>Characteristics of glutamate dehydrogenases used in this study. EC number, length and accession number of the 116 GDH sequences used in this work and names of the 83 organisms to which they belong.</b> |                                                |                 |                 |                       |
|--------------------------------------------------------------------------------------------------------------------------------------------------------------------------------------------------------------|------------------------------------------------|-----------------|-----------------|-----------------------|
| subset                                                                                                                                                                                                       | Organism                                       | EC number       | Amino acids     | GenBank accession no. |
| <b>Ref</b>                                                                                                                                                                                                   | <i>Chlorella sorokiniana</i> (E <sup>a</sup> ) | 1.4.1.4         | 523             | <i>CAA41635</i>       |
|                                                                                                                                                                                                              |                                                |                 | 523             | <i>CAA41636</i>       |
| <b>A</b>                                                                                                                                                                                                     | <i>Asparagus officinalis</i> (E)               | 1.4.1.2         | 411             | <i>CAA09478</i>       |
|                                                                                                                                                                                                              |                                                |                 | 411             | <i>AAL36888</i>       |
|                                                                                                                                                                                                              | 412                                            |                 | <i>AAB39508</i> |                       |
|                                                                                                                                                                                                              | 411                                            |                 | <i>CAD12373</i> |                       |
|                                                                                                                                                                                                              | <i>Nicotiana tabacum</i> (E)                   |                 | 411             | <i>T16981</i>         |
|                                                                                                                                                                                                              | <i>Nicotiana plumbaginifolia</i> (E)           |                 | 411             | <i>CAB94837</i>       |
|                                                                                                                                                                                                              | <i>Vitis vinifera</i> (E)                      |                 | 411             | <i>CAC18730</i>       |
|                                                                                                                                                                                                              | <i>Zea mays</i> (E)                            |                 | 411             | <i>T04342</i>         |
| <b>B</b>                                                                                                                                                                                                     | <i>Clostridium difficile</i> (B)               | 1.4.1.2         | 421             | <i>S28829</i>         |
|                                                                                                                                                                                                              |                                                |                 | 421             | <i>NP_781924</i>      |
|                                                                                                                                                                                                              |                                                |                 | 425             | <i>EAA23508</i>       |
|                                                                                                                                                                                                              |                                                |                 | 439             | <i>NP_603385</i>      |
|                                                                                                                                                                                                              |                                                |                 | 441             | <i>CAC43018</i>       |
|                                                                                                                                                                                                              |                                                |                 | 426             | <i>BAC13766</i>       |
|                                                                                                                                                                                                              |                                                |                 | 421             | <i>A38168</i>         |
| <b>C</b>                                                                                                                                                                                                     | <i>Brucella melitensis</i> (B)                 | 1.4.1.2         | 1600            | <i>AAL51413</i>       |
| <b>D</b>                                                                                                                                                                                                     | <i>Vitis vinifera</i> (E)                      | 1.4.1.3         | 411             | <i>S54797</i>         |
| <b>E</b>                                                                                                                                                                                                     | <i>Pyrococcus furiosus</i> (A)                 | 1.4.1.3         | 420             | <i>NP_579331</i>      |
|                                                                                                                                                                                                              |                                                |                 | 420             | <i>NP_343440</i>      |
|                                                                                                                                                                                                              |                                                |                 | 434             | <i>NP_343336</i>      |
|                                                                                                                                                                                                              |                                                |                 | 420             | <i>NP_343309</i>      |
|                                                                                                                                                                                                              |                                                |                 | 419             | <i>NP_342894</i>      |
| <i>Thermotoga maritima</i> (B)                                                                                                                                                                               | 416                                            | <i>CAA71058</i> |                 |                       |
| <b>F</b>                                                                                                                                                                                                     | <i>Chaenocephalus aceratus</i> (B)             | 1.4.1.3         | 504             | <i>P82264</i>         |
|                                                                                                                                                                                                              |                                                |                 | 549             | <i>S42919</i>         |
|                                                                                                                                                                                                              |                                                |                 | 503             | <i>P00368</i>         |
|                                                                                                                                                                                                              |                                                |                 | 558             | <i>CAA46995</i>       |
|                                                                                                                                                                                                              |                                                |                 | 558             | <i>NP_032159</i>      |
|                                                                                                                                                                                                              |                                                |                 | 544             | <i>CAD58716</i>       |
| 539                                                                                                                                                                                                          | <i>CAD58714</i>                                |                 |                 |                       |
| <b>G</b>                                                                                                                                                                                                     | <i>Agaricus bisporus</i> (E)                   | 1.4.1.4         | 457             | <i>S63608</i>         |
|                                                                                                                                                                                                              |                                                |                 | 458             | <i>NP_242967</i>      |
|                                                                                                                                                                                                              |                                                |                 | 460             | <i>AAC69873</i>       |
|                                                                                                                                                                                                              |                                                |                 | 447             | <i>NP_601279</i>      |
|                                                                                                                                                                                                              |                                                |                 | 447             | <i>NP_754056</i>      |
|                                                                                                                                                                                                              |                                                |                 | 447             | <i>DEECEN</i>         |
|                                                                                                                                                                                                              |                                                |                 | 449             | <i>A42489</i>         |
|                                                                                                                                                                                                              |                                                |                 | 449             | <i>A64053</i>         |
|                                                                                                                                                                                                              |                                                |                 | 450             | <i>P54388</i>         |
|                                                                                                                                                                                                              |                                                |                 | 461             | <i>AAF00006</i>       |
|                                                                                                                                                                                                              |                                                |                 | 447             | <i>AAL20224</i>       |
|                                                                                                                                                                                                              |                                                |                 | 448             | <i>NP_358774</i>      |

|                               |                                         |         |                 |                  |
|-------------------------------|-----------------------------------------|---------|-----------------|------------------|
| <b>G</b>                      | <i>Trypanosoma cruzi</i> (E)            |         | 446             | <b>AAC14692</b>  |
|                               |                                         | 1.4.1.4 | 446             | <b>AAC14691</b>  |
|                               | <i>Tuber borchii</i> (E)                |         | 457             | <b>AAG28788</b>  |
| <b>H</b>                      | <i>Arabidopsis thaliana</i> (E)         |         | 411             | <b>NP_196361</b> |
|                               | <i>Brassica napus</i> (E)               |         | 411             | <b>BAB62170</b>  |
|                               | <i>Nicotiana plumbaginifolia</i> (E)    | NC      | 411             | <b>TI6982</b>    |
|                               | <i>Oryza sativa</i> (E)                 |         | 411             | <b>AAO37984</b>  |
|                               | <i>Ulva pertusa</i> (E)                 |         | 421             | <b>BAB62312</b>  |
|                               |                                         |         | 447             | <b>BAB62311</b>  |
| <b>I1</b>                     | <i>Bacillus halodurans</i> (B)          |         | 430             | <b>NP_243584</b> |
|                               | <i>Bacillus halodurans</i> (B)          |         | 420             | <b>NP_244810</b> |
|                               | <i>Bacillus halodurans</i> (B)          |         | 421             | <b>NP_242488</b> |
|                               | <i>Chlorobium tepidum</i> (B)           |         | 418             | <b>NP_662898</b> |
|                               | <i>Pyrococcus abyssi</i> (A)            |         | 420             | <b>NP_126260</b> |
|                               | <i>Pyrococcus endeavori</i> (A)         | NC      | 420             | <b>AAA64795</b>  |
|                               |                                         |         | 420             | <b>A47410</b>    |
|                               | <i>Staphylococcus aureus</i> (B)        |         | 414             | <b>NP_374080</b> |
|                               | <i>Staphylococcus epidermidis</i> (B)   |         | 414             | <b>NP_764209</b> |
|                               | <i>Synechocystis</i> sp. PCC6803 (B)    |         | 428             | <b>NP_442685</b> |
|                               | <i>Thermococcus waiotapuensis</i> (A)   |         | 419             | <b>AAK53112</b>  |
|                               | <i>Thermoplasma volcanium</i> (A)       |         | 416             | <b>BAB59913</b>  |
|                               |                                         |         | 435             | <b>BAB59912</b>  |
| <b>I2</b>                     | <i>Bacteroides thetaiotaomicron</i> (B) |         | 444             | <b>NP_810883</b> |
|                               | <i>Bifidobacterium longum</i> (B)       |         | 448             | <b>NP_695816</b> |
|                               | <i>Clostridium acetobutylicum</i> (B)   |         | 443             | <b>NP_347373</b> |
|                               | <i>Corynebacterium efficiens</i> (B)    |         | 466             | <b>BAB86838</b>  |
|                               | <i>Deinococcus radiodurans</i> (B)      |         | 424             | <b>E75362</b>    |
|                               | <i>Entodinium caudatum</i> (E)          |         | 438             | <b>AAF15393</b>  |
|                               | <i>Escherichia coli</i> (B)             |         | 447             | <b>NP_288194</b> |
|                               |                                         |         | 447             | <b>AAA23868</b>  |
|                               | <i>Klebsiella aerogenes</i> (B)         | NC      | 447             | <b>AAK17986</b>  |
|                               | <i>Plasmodium falciparum</i> (E)        |         | 470             | <b>NP_702052</b> |
|                               |                                         |         | 442             | <b>AAG12331</b>  |
|                               |                                         |         | 442             | <b>AAD11789</b>  |
|                               | <i>Pseudomonas aeruginosa</i> (B)       |         | 445             | <b>NP_253278</b> |
|                               | <i>Ruminococcus flavefaciens</i> (B)    |         | 455             | <b>AAN15204</b>  |
|                               | <i>Salmonella enterica</i> (B)          |         | 447             | <b>NP_804986</b> |
|                               | <i>Streptococcus agalactiae</i> (B)     |         | 449             | <b>NP_688333</b> |
|                               | <i>Streptococcus pneumoniae</i> (B)     |         | 448             | <b>NP_345769</b> |
| <i>Streptococcus suis</i> (A) |                                         | 448     | <b>AAK00759</b> |                  |
| <b>I3</b>                     | <i>Bacteroides fragilis</i> (B)         |         | 445             | <b>AAC26399</b>  |
|                               | <i>Bacteroides thetaiotaomicron</i> (B) |         | 445             | <b>NP_810886</b> |
|                               | <i>Botryotinia fuckeliana</i> (E)       |         | 450             | <b>AAC95390</b>  |
|                               | <i>Debaryomyces hansenii</i> (E)        |         | 418             | <b>AAF98446</b>  |
|                               | <i>Gibberella fujikuroi</i> (E)         |         | 451             | <b>CAC45043</b>  |
|                               | <i>Helicobacter pylori</i> (B)          |         | 448             | <b>D64567</b>    |
|                               |                                         | NC      | 448             | <b>F71862</b>    |
|                               | <i>Neurospora crassa</i> (E)            |         | 454             | <b>EAA32325</b>  |
|                               |                                         |         | 454             | <b>1003201A</b>  |
|                               | <i>Neurospora intermedia</i> (E)        |         | 454             | <b>AAG01158</b>  |
|                               | <i>Neurospora sitophila</i> (E)         |         | 454             | <b>AAG01159</b>  |
|                               |                                         |         | 454             | <b>NP_015020</b> |
|                               | <i>Saccharomyces cerevisiae</i> (E)     |         | 453             | <b>1111238A</b>  |
|                               |                                         | 454     | <b>AAB03898</b> |                  |

|                                                       |                                       |    |      |                  |
|-------------------------------------------------------|---------------------------------------|----|------|------------------|
| <b>J</b>                                              | <i>Bos taurus</i> (E)                 |    | 520  | <b>AAN15276</b>  |
|                                                       | <i>Homo sapiens</i> (E)               |    | 558  | <b>CAA30521</b>  |
|                                                       | <i>Oncorhynchus mykiss</i> (E)        | NC | 539  | <b>AAM73777</b>  |
|                                                       |                                       |    | 544  | <b>AAM73775</b>  |
|                                                       | <i>Rattus norvegicus</i> (E)          |    | 558  | <b>CAA32202</b>  |
| <b>K</b>                                              | <i>Agaricus bisporus</i> (E)          |    | 1029 | <b>CAB40797</b>  |
|                                                       | <i>Gibberella fujikuroi</i> (E)       |    | 1059 | <b>CAC27837</b>  |
|                                                       | <i>Neurospora crassa</i> (E)          | NC | 1047 | <b>AAB28355</b>  |
|                                                       | <i>Saccharomyces cerevisiae</i> (E)   |    | 1092 | <b>NP_010066</b> |
|                                                       | <i>Schizosaccharomyces pombe</i> (E)  |    | 1106 | <b>T40931</b>    |
| <b>L</b>                                              | <i>Caulobacter crescentus</i> (B)     |    | 1607 | <b>NP_418907</b> |
|                                                       | <i>Mycobacterium leprae</i> (B)       |    | 1622 | <b>NP_301902</b> |
|                                                       | <i>Mycobacterium tuberculosis</i> (B) |    | 1624 | <b>NP_337039</b> |
|                                                       | <i>Pseudomonas aeruginosa</i> (B)     | NC | 1620 | <b>AAG53963</b>  |
|                                                       | <i>Streptomyces avermitilis</i> (B)   |    | 1645 | <b>BAC72787</b>  |
|                                                       | <i>Streptomyces clavuligerus</i> (B)  |    | 1651 | <b>AAG40620</b>  |
|                                                       | <i>Vibrio cholerae</i> (B)            |    | 1613 | <b>NP_231133</b> |
| <sup>a</sup> A, Archaea - B, Bacteria - E, Eukaryota. |                                       |    |      |                  |
